# Supplementary material for: Inferring the number of COVID-19 cases from recently reported deaths
Source: PubMed Central journal article supplement (PMC7239087; doi:10.1101/2020.03.10.20033761), 2020-03-13
Supplement: 73470-2020.03.10.20033761-1.pdf [file 73470-2020.03.10.20033761-1.pdf]

## **Additional methodological information and complementary results**

*This supplementary material is hosted by Eurosurveillance as supporting information alongside the article “**Inferring the number of COVID-19 cases from recently reported deaths**” on behalf of the authors who remain responsible for the accuracy and appropriateness of the content. The same standards for ethics, copyright, attributions and permissions as for the article apply. Eurosurveillance is not responsible for the maintenance of any links or email addresses provided therein.”*

*For details about the formatting of supplementary material please see our instructions for authors: <https://www.eurosurveillance.org/for-authors>*

## 1. MODEL PARAMETERS

### 1.1. Serial interval

Our model requires some epidemiological parameters in order to simulate an epidemic of COVID-19. In order to ensure this epidemic reflects the true nature of the multiple global outbreaks of COVID-19, we draw from the most up-to-date probability distributions when such parameters are required.

One such parameter is the serial interval, which was taken from (1). The resulting distribution fitted is a Lognormal distribution with a mean of 4.7 days (95% CrI: 3.7, 6.0) and a SD of 2.9 days (95% CrI: 1.9, 4.9). Sampling and discretizing at the time scale of days gives the following distribution used in our analysis (Figure S1):

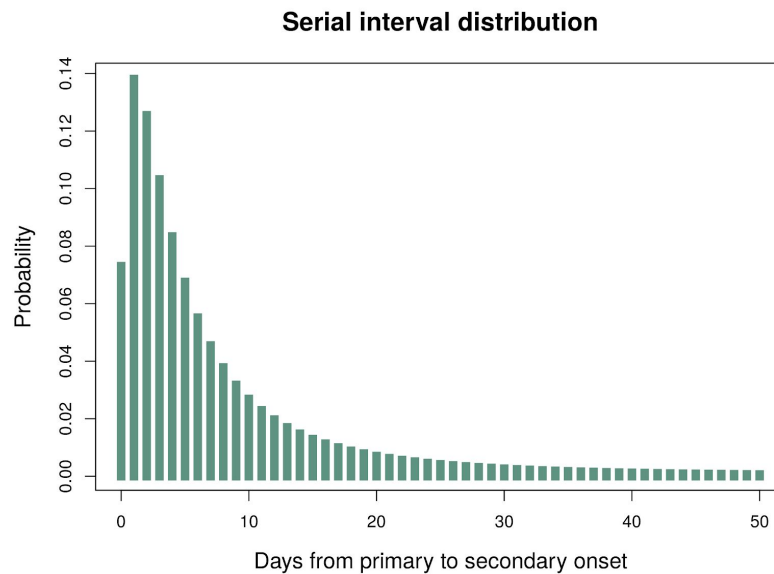

**Figure S1:** Probability mass function of the serial interval distribution.

## 1.2 Delay from onset to death

The distribution for the delay from onset-to-death was taken from Nishiura *et al.* (1), and implemented as a discretised Gamma distribution with a shape of 4.726 and a rate 0.3151, corresponding to a mean of 15 days and a standard deviation of 6.9 days.

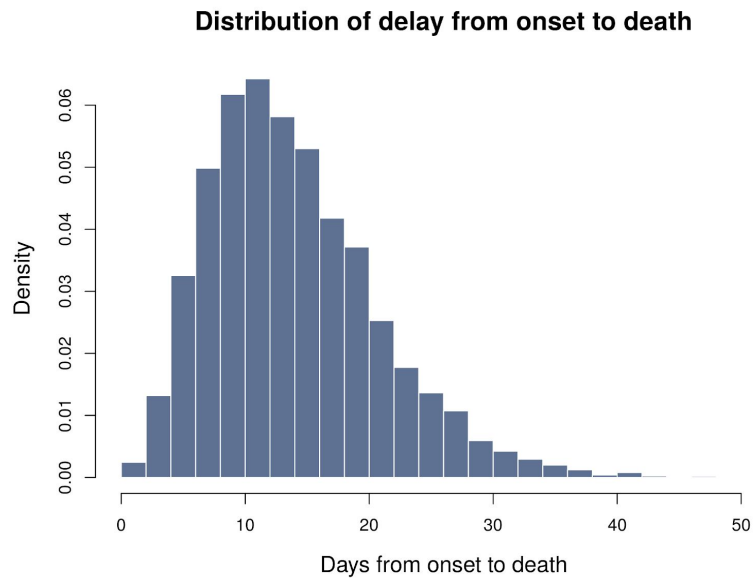

**Figure S2:** Probability mass function of onset-to-death distribution.

### 1.3 Number of cases per death

The numbers of cases per death was inferred from the case fatality ratio (CFR), as the number of Bernoulli trials (cases) of a Binomial distribution with 1 “success” (death) and a probability of success equal to the CFR. By definition, this means the number of cases can be drawn from a Geometric distribution with a probability equal to the CFR.

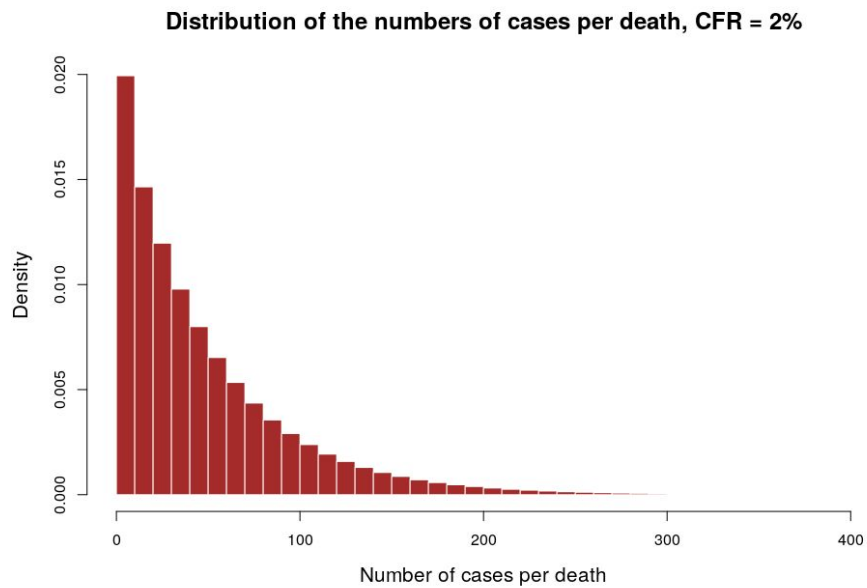

**Figure S3:** Probability mass function of the number of cases per death (CFR = 2%).

## 2. MODEL IMPLEMENTATION

Our model is implemented in a simulation algorithm involving the following steps:

For each death:

- draw a likely date of onset from the onset-to-death delay distribution; obtain one date of onset per death
- draw the total number of concurrent cases as the sample size of a Binomial distribution with probability = CFR and 1 success
- simulate several (50, by default) epidemic trajectories with a Poisson branching process using specified reproduction numbers ( $R$ ) and serial interval distribution, until present time
- add epidemic trajectories from every deaths

A typical run of our model involves several hundreds (by default, 200) simulations, which are concatenated, and from which summaries are then derived.

All implementation has been realised in the R software (2), using the RECON packages *incidence* (3) and *projections* (4). Scripts and Rmarkdown documents implementing the model are freely available from github:

[https://github.com/thibautjombart/covid19\\_cases\\_from\\_deaths/tree/master/analyses](https://github.com/thibautjombart/covid19_cases_from_deaths/tree/master/analyses)

A user-friendly, interactive web application implementing the model is available at:

<https://cmmid.github.io/visualisations/inferring-covid19-cases-from-deaths>

### 3. COUNTRY-SPECIFIC ANALYSES

#### 3.1. Country

We obtained dates of deaths for countries with recently reported Covid-19 related deaths and no known ongoing transmission; United Kingdom, Spain, France, and Italy. Data was obtained from <https://bnonews.com/index.php/2020/02/the-latest-coronavirus-cases/>.

Results for 200 simulations are reported in the table below. We modelled different scenarios, using R of 1.5, 2, or 3, and CFR of 1, 2, 3, or 10%

| country | R   | CFR  | reported | median | lower95 | lower50 | upper50 | upper95 |
|---------|-----|------|----------|--------|---------|---------|---------|---------|
| Spain   | 1.5 | 1 %  | 202      | 230    | 5       | 81      | 541     | 1 899   |
| Spain   | 2   | 1 %  | 202      | 564    | 27      | 223     | 1 494   | 22 549  |
| Spain   | 3   | 1 %  | 202      | 2 613  | 25      | 733     | 9 184   | 200 893 |
| Spain   | 1.5 | 2 %  | 202      | 129    | 3       | 45      | 284     | 995     |
| Spain   | 2   | 2 %  | 202      | 263    | 8       | 95      | 823     | 7 829   |
| Spain   | 3   | 2 %  | 202      | 1 226  | 30      | 383     | 4 120   | 147 823 |
| Spain   | 1.5 | 3 %  | 202      | 73     | 1       | 26      | 178     | 798     |
| Spain   | 2   | 3 %  | 202      | 179    | 2       | 54      | 470     | 2 664   |
| Spain   | 3   | 3 %  | 202      | 670    | 6       | 170     | 2 892   | 100 089 |
| Spain   | 1.5 | 10 % | 202      | 25     | 0       | 8       | 63      | 227     |
| Spain   | 2   | 10 % | 202      | 55     | 0       | 15      | 147     | 1 198   |
| Spain   | 3   | 10 % | 202      | 229    | 1       | 66      | 809     | 31 401  |
| Italy   | 1.5 | 1 %  | 2037     | 1      | 596     | 20      | 219     | 1 596   |
| Italy   | 2   | 1 %  | 2037     | 1      | 2 197   | 64      | 868     | 5 315   |
| Italy   | 3   | 1 %  | 2037     | 1      | 24 298  | 570     | 8 245   | 115 267 |
| Italy   | 1.5 | 2 %  | 2037     | 1      | 307     | 6       | 124     | 678     |
| Italy   | 2   | 2 %  | 2037     | 1      | 1 087   | 15      | 284     | 2 644   |
| Italy   | 3   | 2 %  | 2037     | 1      | 14 506  | 405     | 4 079   | 48 320  |

|               |     |      |      |   |       |     |       |        |
|---------------|-----|------|------|---|-------|-----|-------|--------|
| <b>Italy</b>  | 1.5 | 3 %  | 2037 | 1 | 194   | 5   | 91    | 392    |
| <b>Italy</b>  | 2   | 3 %  | 2037 | 1 | 654   | 15  | 247   | 1 666  |
| <b>Italy</b>  | 3   | 3 %  | 2037 | 1 | 9 512 | 198 | 3 143 | 31 839 |
| <b>Italy</b>  | 1.5 | 10 % | 2037 | 1 | 50    | 0   | 17    | 112    |
| <b>Italy</b>  | 2   | 10 % | 2037 | 1 | 224   | 1   | 81    | 606    |
| <b>Italy</b>  | 3   | 10 % | 2037 | 1 | 2 596 | 26  | 728   | 8 155  |
| <b>France</b> | 1.5 | 1 %  | 190  | 1 | 430   | 13  | 153   | 1 100  |
| <b>France</b> | 2   | 1 %  | 190  | 1 | 1 513 | 15  | 467   | 3 377  |
| <b>France</b> | 3   | 1 %  | 190  | 1 | 6 664 | 210 | 2 252 | 29 244 |
| <b>France</b> | 1.5 | 2 %  | 190  | 1 | 205   | 6   | 82    | 460    |
| <b>France</b> | 2   | 2 %  | 190  | 1 | 540   | 8   | 191   | 1 712  |
| <b>France</b> | 3   | 2 %  | 190  | 1 | 4 533 | 115 | 1 378 | 16 949 |
| <b>France</b> | 1.5 | 3 %  | 190  | 1 | 141   | 1   | 45    | 316    |
| <b>France</b> | 2   | 3 %  | 190  | 1 | 291   | 4   | 116   | 844    |
| <b>France</b> | 3   | 3 %  | 190  | 1 | 2 970 | 52  | 851   | 8 728  |
| <b>France</b> | 1.5 | 10 % | 190  | 1 | 45    | 0   | 14    | 109    |
| <b>France</b> | 2   | 10 % | 190  | 1 | 114   | 1   | 39    | 359    |
| <b>France</b> | 3   | 10 % | 190  | 1 | 849   | 7   | 224   | 3 644  |

**Table S1.** Inferred number of cases at 4th of March in Spain, Italy, and France, assuming a net reproduction number (R) of 1.5, 2, and 3 and a case fatality ratio (CFR) of 1, 2, 3, and 10%.

#### 4. NEGATIVE BINOMIAL ESTIMATES

We investigated the potential impact of heterogeneity in transmissibility using recent characterisation of the offspring distribution using a Negative binomial ( $k = 0.54$  (5)). Results for a single death are reported in the table below.

| R   | cfr  | median | lower_95 | lower_50 | upper_50 | upper_95 |
|-----|------|--------|----------|----------|----------|----------|
| 1.5 | 0.01 | 261    | 6        | 97       | 618      | 2 714    |
| 2.0 | 0.01 | 640    | 7        | 244      | 1 763    | 8 908    |
| 3.0 | 0.01 | 2 989  | 35       | 555      | 11 177   | 188 220  |
| 1.5 | 0.02 | 121    | 5        | 49       | 311      | 1 894    |
| 2.0 | 0.02 | 289    | 5        | 79       | 758      | 6 023    |
| 3.0 | 0.02 | 1 358  | 8        | 310      | 4 190    | 52 341   |
| 1.5 | 0.03 | 75     | 2        | 29       | 240      | 776      |
| 2.0 | 0.03 | 183    | 2        | 58       | 517      | 2 313    |
| 3.0 | 0.03 | 853    | 9        | 227      | 3 425    | 66 083   |
| 1.5 | 0.10 | 27     | 0        | 9        | 56       | 205      |
| 2.0 | 0.10 | 56     | 0        | 14       | 184      | 1 228    |
| 3.0 | 0.10 | 204    | 3        | 53       | 644      | 12 055   |

**Table S2.** Impact of using a Negative binomial distribution for the number of secondary cases used in the branching process after introduction of a single death, on the date at which the death occurred. This table should be compared to table 1 in the main paper.



## REFERENCES

1. Nishiura H, Linton NM, Akhmetzhanov AR. Serial interval of novel coronavirus (2019-nCoV) infections. medRxiv [Internet]. 2020; Available from: <https://www.medrxiv.org/content/medrxiv/early/2020/02/17/2020.02.03.20019497.full.pdf>
2. R Core Team. R: A Language and Environment for Statistical Computing [Internet]. Vienna, Austria: R Foundation for Statistical Computing; 2020. Available from: <https://www.R-project.org/>
3. Kamvar ZN, Cai J, Pulliam JRC, Schumacher J, Jombart T. Epidemic curves made easy using the R package *incidence*. F1000Res. 2019 Jan 31;8:139.
4. Project Future Case Incidence [R package projections version 0.3.1]. [cited 2020 Mar 4]; Available from: <https://cran.r-project.org/web/packages/projections/index.html>
5. Riou J, Althaus CL. Pattern of early human-to-human transmission of Wuhan 2019 novel coronavirus (2019-nCoV), December 2019 to January 2020. Euro Surveill [Internet]. 2020 Jan;25(4). Available from: <http://dx.doi.org/10.2807/1560-7917.ES.2020.25.4.2000058>
